# Supplementary material
Source: PubMed Central journal article supplement (PMC3433400)
Supplement: NIHMS295655-supplement-1_si_001.pdf [file NIHMS295655-supplement-1_si_001.pdf]

## SUPPORTING ONLINE MATERIAL

### Infrared and Raman Spectroscopic Studies of the Antimicrobial Effects of Garlic Concentrates and Diallyl Constituents on Foodborne Pathogens

Xiaonan Lu <sup>1,3</sup>, Barbara A. Rasco <sup>1\*</sup>, Dong-Hyun Kang <sup>1</sup>, Jamie M.F. Jabal <sup>2</sup>, D. Eric Aston <sup>2</sup>, and Michael E. Konkel <sup>3</sup>

<sup>1</sup> School of Food Science, Washington State University, Pullman 99163, USA

<sup>2</sup> Department of Chemical and Materials Engineering, University of Idaho, Moscow 83844, USA

<sup>3</sup> School of Molecular Biosciences, Washington State University, Pullman, WA 99163, USA

#### CONTENTS:

**Table S1. Effect of garlic concentrate (*Allium sativum*) on growth of *Escherichia coli* O157:H7 in sterilized tryptic soy broth at different temperature treatments for 0, 1, 3, 5 and 7 days (N=3).**

| Temperature treatments (°C) | Concentration (µl/ml) | Viable cell counts (log CFU/ml) |           |           |           |           |
|-----------------------------|-----------------------|---------------------------------|-----------|-----------|-----------|-----------|
|                             |                       | 0 day                           | 1 day     | 3 days    | 5 days    | 7 days    |
| 4                           | 0                     | 5.03±0.21                       | 5.08±0.41 | 5.01±0.25 | 5.06±0.09 | 4.95±0.15 |
|                             | 25                    | 5.14±0.31                       | 5.09±0.28 | 5.02±0.31 | 5.00±0.18 | 4.93±0.08 |
|                             | 50                    | 5.12±0.24                       | 5.04±0.17 | 4.93±0.28 | 4.90±0.21 | 4.89±0.32 |
|                             | 75                    | 5.10±0.09                       | 5.09±0.31 | 4.93±0.37 | 4.81±0.08 | 4.83±0.17 |
|                             | 100                   | 5.01±0.12                       | 5.02±0.26 | 4.91±0.24 | 4.99±0.06 | 4.93±0.34 |
|                             | 200                   | 5.33±0.23                       | 5.00±0.13 | 5.01±0.31 | 4.85±0.14 | 4.20±0.26 |
| 22                          | 0                     | 4.92±0.35                       | 9.31±0.73 | 9.25±0.24 | 9.23±0.81 | 9.17±0.47 |
|                             | 25                    | 4.98±0.12                       | 4.85±0.21 | 4.01±0.41 | 2.93±0.16 | 0         |
|                             | 50                    | 4.86±0.09                       | 4.71±0.54 | 2.76±0.26 | 0         | 0         |
|                             | 75                    | 4.81±0.41                       | 4.65±0.31 | 0         | 0         | 0         |
|                             | 100                   | 4.86±0.12                       | 4.39±0.44 | 0         | 0         | 0         |
|                             | 200                   | 4.87±0.23                       | 4.16±0.18 | 0         | 0         | 0         |
| 35                          | 0                     | 5.00±0.13                       | 9.24±0.49 | 9.26±0.25 | 9.12±0.79 | 9.18±0.31 |
|                             | 25                    | 5.02±0.24                       | 2.28±0.34 | 0         | 0         | 0         |
|                             | 50                    | 5.01±0.17                       | 0         | 0         | 0         | 0         |
|                             | 75                    | 5.03±0.41                       | 0         | 0         | 0         | 0         |
|                             | 100                   | 4.87±0.07                       | 0         | 0         | 0         | 0         |
|                             | 200                   | 5.05±0.21                       | 0         | 0         | 0         | 0         |

**Table S2. Effect of garlic concentrate (*Allium sativum*) on growth of *Listeria monocytogenes* in sterilized tryptic soy broth at different temperature treatments for 0, 1, 3, 5 and 7 days (N=3).**

| Temperature treatments (°C) | Concentration (µl/ml) | Viable cell counts (log CFU/ml) |           |           |           |           |
|-----------------------------|-----------------------|---------------------------------|-----------|-----------|-----------|-----------|
|                             |                       | 0 day                           | 1 day     | 3 days    | 5 days    | 7 days    |
| 4                           | 0                     | 4.99±0.26                       | 5.13±0.29 | 5.39±0.19 | 6.07±0.40 | 6.22±0.23 |
|                             | 25                    | 5.03±0.38                       | 4.86±0.37 | 4.77±0.12 | 4.43±0.53 | 4.30±0.26 |
|                             | 50                    | 4.99±0.39                       | 4.75±0.24 | 4.66±0.09 | 4.61±0.12 | 4.45±0.31 |
|                             | 75                    | 4.94±0.13                       | 4.91±0.26 | 4.69±0.19 | 4.71±0.07 | 4.36±0.36 |
|                             | 100                   | 4.88±0.08                       | 4.86±0.27 | 4.76±0.20 | 4.53±0.32 | 4.68±0.36 |
|                             | 200                   | 4.99±0.27                       | 4.82±0.14 | 4.80±0.39 | 4.34±0.26 | 4.34±0.23 |

|    |     |           |           |           |           |           |
|----|-----|-----------|-----------|-----------|-----------|-----------|
| 22 | 0   | 4.96±0.31 | 8.21±0.37 | 8.34±0.28 | 7.49±0.40 | 7.28±0.19 |
|    | 25  | 5.03±0.21 | 4.98±0.24 | 4.92±0.31 | 4.64±0.43 | 3.54±0.29 |
|    | 50  | 5.03±0.17 | 4.96±0.31 | 4.77±0.24 | 4.42±0.31 | 3.43±0.42 |
|    | 75  | 4.99±0.09 | 4.80±0.54 | 4.59±0.08 | 4.23±0.36 | 2.11±0.26 |
|    | 100 | 4.97±0.09 | 4.62±0.51 | 4.27±0.18 | 4.13±0.22 | 1.85±0.34 |
|    | 200 | 4.97±0.27 | 4.68±0.49 | 4.24±0.34 | 2.97±0.24 | 1.48±0.24 |
| 35 | 0   | 4.94±0.23 | 8.89±0.14 | 9.01±0.29 | 8.72±0.37 | 8.36±0.63 |
|    | 25  | 4.99±0.31 | 3.63±0.30 | 1.48±0.39 | 0         | 0         |
|    | 50  | 4.79±0.32 | 2.92±0.21 | 0         | 0         | 0         |
|    | 75  | 5.03±0.43 | 2.88±0.32 | 0         | 0         | 0         |
|    | 100 | 5.00±0.25 | 2.45±0.12 | 0         | 0         | 0         |
|    | 200 | 4.95±0.42 | 0         | 0         | 0         | 0         |

**Table S3. Effect of diallyl sulfide on growth of *E. coli* O157:H7 in sterilized tryptic soy broth at different temperature treatments for 0, 1, 2, 3, 4, 5, 6 and 7 days (N=3).**

| Temperature treatments | Concentration | <i>E. coli</i> O157:H7 viable cell counts (log CFU/ml) |           |           |           |           |           |           |           |
|------------------------|---------------|--------------------------------------------------------|-----------|-----------|-----------|-----------|-----------|-----------|-----------|
|                        |               | 0 day                                                  | 1 day     | 2 days    | 3 days    | 4 days    | 5 days    | 6 days    | 7 days    |
| 4°C                    | control       | 5.08±0.06                                              | 5.18±0.12 | 5.20±0.18 | 5.17±0.21 | 5.16±0.19 | 4.93±0.19 | 4.96±0.20 | 4.89±0.23 |
|                        | 5 μM          | 5.03±0.11                                              | 5.09±0.21 | 5.12±0.12 | 4.81±0.16 | 4.71±0.15 | 4.30±0.16 | 4.23±0.18 | 4.22±0.18 |
|                        | 10 μM         | 5.00±0.11                                              | 4.62±0.22 | 4.29±0.31 | 4.01±0.41 | 3.85±0.37 | 2.01±0.34 | 0         | 0         |
|                        | 20 μM         | 5.10±0.09                                              | 4.43±0.19 | 4.26±0.21 | 4.14±0.23 | 0         | 0         | 0         | 0         |
| 22°C                   | control       | 4.96±0.11                                              | 9.18±0.15 | 9.14±0.11 | 9.03±0.18 | 8.96±0.15 | 8.98±0.14 | 9.17±0.12 | 9.10±0.20 |
|                        | 5 μM          | 4.92±0.10                                              | 8.17±0.22 | 8.48±0.25 | 8.54±0.15 | 8.56±0.34 | 8.43±0.29 | 8.26±0.12 | 7.98±0.17 |
|                        | 10 μM         | 4.99±0.09                                              | 7.09±0.21 | 5.46±0.14 | 3.79±0.43 | 2.48±0.21 | 1.31±0.12 | 0         | 0         |
|                        | 20 μM         | 4.99±0.09                                              | 7.03±0.14 | 4.38±0.33 | 0         | 0         | 0         | 0         | 0         |
| 35°C                   | control       | 4.98±0.12                                              | 9.02±0.19 | 9.26±0.22 | 9.04±0.17 | 9.18±0.19 | 9.02±0.20 | 9.00±0.12 | 9.15±0.18 |
|                        | 5 μM          | 4.98±0.12                                              | 8.88±0.24 | 8.79±0.15 | 8.99±0.29 | 9.10±0.26 | 9.02±0.31 | 8.98±0.12 | 9.06±0.23 |
|                        | 10 μM         | 5.00±0.15                                              | 5.79±0.22 | 0         | 0         | 0         | 0         | 0         | 0         |
|                        | 20 μM         | 5.02±0.08                                              | 4.40±0.17 | 0         | 0         | 0         | 0         | 0         | 0         |

**Table S4. Effect of diallyl sulfide on growth of *Listeria monocytogenes* in sterilized tryptic soy broth at different temperature treatments for 0, 1, 2, 3, 4, 5, 6 and 7 days (N=3).**

| Temperature treatments | Concentration | <i>L. monocytogenes</i> viable cell counts (log CFU/ml) |           |           |           |           |           |           |           |
|------------------------|---------------|---------------------------------------------------------|-----------|-----------|-----------|-----------|-----------|-----------|-----------|
|                        |               | 0 day                                                   | 1 day     | 2 days    | 3 days    | 4 days    | 5 days    | 6 days    | 7 days    |
| 4°C                    | control       | 4.93±0.11                                               | 5.11±0.22 | 5.17±0.17 | 5.24±0.18 | 5.33±0.19 | 5.85±0.13 | 5.99±0.11 | 6.15±0.12 |
|                        | 5 μM          | 5.00±0.09                                               | 5.08±0.11 | 4.98±0.19 | 5.03±0.18 | 5.08±0.21 | 5.00±0.12 | 5.14±0.31 | 5.08±0.16 |
|                        | 10 μM         | 4.99±0.09                                               | 5.16±0.13 | 5.16±0.18 | 5.29±0.09 | 4.91±0.15 | 4.96±0.16 | 4.91±0.20 | 4.73±0.18 |
|                        | 20 μM         | 4.97±0.08                                               | 5.25±0.18 | 5.25±0.13 | 5.05±0.14 | 4.94±0.16 | 4.93±0.17 | 4.86±0.11 | 4.83±0.19 |
| 22°C                   | control       | 4.98±0.12                                               | 8.01±0.18 | 8.81±0.15 | 8.57±0.21 | 8.57±0.19 | 8.31±0.31 | 8.37±0.22 | 7.84±0.24 |
|                        | 5 μM          | 5.01±0.18                                               | 7.79±0.19 | 8.61±0.22 | 7.54±0.20 | 7.03±0.18 | 6.42±0.36 | 6.03±0.28 | 5.19±0.27 |
|                        | 10 μM         | 5.02±0.09                                               | 8.00±0.17 | 8.64±0.19 | 6.64±0.21 | 4.57±0.12 | 3.40±0.11 | 2.90±0.09 | 0         |

|      |            |                 |                 |                 |                 |                 |                 |                 |                 |
|------|------------|-----------------|-----------------|-----------------|-----------------|-----------------|-----------------|-----------------|-----------------|
|      | 20 $\mu$ M | 5.08 $\pm$ 0.10 | 7.72 $\pm$ 0.16 | 8.64 $\pm$ 0.15 | 5.92 $\pm$ 0.10 | 0               | 0               | 0               | 0               |
| 35°C | control    | 4.98 $\pm$ 0.09 | 9.27 $\pm$ 0.17 | 8.32 $\pm$ 0.18 | 9.04 $\pm$ 0.17 | 8.96 $\pm$ 0.12 | 8.76 $\pm$ 0.21 | 8.68 $\pm$ 0.23 | 8.62 $\pm$ 0.17 |
|      | 5 $\mu$ M  | 5.00 $\pm$ 0.14 | 9.13 $\pm$ 0.11 | 6.92 $\pm$ 0.31 | 5.48 $\pm$ 0.29 | 0               | 0               | 0               | 0               |
|      | 10 $\mu$ M | 5.00 $\pm$ 0.13 | 9.08 $\pm$ 0.09 | 4.27 $\pm$ 0.27 | 0               | 0               | 0               | 0               | 0               |
|      | 20 $\mu$ M | 5.02 $\pm$ 0.12 | 8.97 $\pm$ 0.18 | 3.45 $\pm$ 0.29 | 0               | 0               | 0               | 0               | 0               |

**Table S5 (a). Band assignments of bacterial Raman spectra**

| <i>Escherichia coli</i> O157:H7 |                                                                     | <i>Listeria monocytogenes</i>  |                                                         |
|---------------------------------|---------------------------------------------------------------------|--------------------------------|---------------------------------------------------------|
| Wavenumber (cm <sup>-1</sup> )  | Assignment*                                                         | Wavenumber (cm <sup>-1</sup> ) | Assignment                                              |
| 754                             | symmetric breathing of tryptophan                                   | 666                            | ring breathing modes in DNA base                        |
| 788                             | O-P-O stretching DNA                                                | 788                            | O-P-O stretching DNA                                    |
| 823                             | out-of-plane ring breathing of tyrosine                             | 1008                           | phenylalanine                                           |
| 879                             | tryptophan                                                          | 1090                           | sym phosphate str vibr                                  |
| 968                             | lipids                                                              | 1112                           | saccharide                                              |
| 1008                            | phenylalanine                                                       | 1134                           | lipids                                                  |
| 1043                            | carbohydrate                                                        | 1168                           | lipids                                                  |
| 1093                            | sym PO <sub>2</sub> <sup>-</sup> str vibr of DNA backbone vibration | 1243                           | amide III                                               |
| 1130                            | phospholipid                                                        | 1261                           | amide III                                               |
| 1174                            | tyrosine, phenylalanine and C-H bend of protein                     | 1297                           | fatty acids                                             |
| 1243                            | amide III                                                           | 1321                           | amide III                                               |
| 1309                            | CH <sub>3</sub> /CH <sub>2</sub> twisting or bending mode of lipid  | 1335                           | CH <sub>3</sub> CH <sub>2</sub> wagging of nucleic acid |
| 1343                            | CH <sub>3</sub> and CH <sub>2</sub> wagging                         | 1367                           | vs (CH <sub>3</sub> ) of phospholipids                  |
| 1401                            | bending modes of methyl group                                       | 1415                           | ring structure of nucleic acid                          |
| 1454                            | phospholipids                                                       | 1453                           | phospholipids                                           |
| 1586                            | phenylalanine                                                       | 1531                           | amide structure                                         |
| 1676                            | amide I ( $\beta$ -sheet)                                           | 1577                           | bound and free NADH                                     |
| 2935                            | chain end CH <sub>3</sub> sym band                                  | 1669                           | carbonyl stretch                                        |
| 3059                            | unsaturated =CH stretch                                             | 1689                           | amide I                                                 |

**Table S5 (b). Band assignments of bacterial FT-IR spectra**

| Wavenumber (cm <sup>-1</sup> ) | Assignment                                                  |
|--------------------------------|-------------------------------------------------------------|
| 918                            | phosphodiester                                              |
| 970                            | phosphodiester                                              |
| 1060                           | polysaccharides                                             |
| 1080                           | sym P=O of nucleic acid                                     |
| 1236                           | asym P=O of nucleic acid                                    |
| 1400                           | sym str of C-O                                              |
| 1455                           | CH <sub>2</sub> bending of lipids                           |
| 1545                           | amide II                                                    |
| 1647                           | amide I                                                     |
| 2854                           | methylene groups from lipids                                |
| 2929                           | methylene groups from lipids                                |
| 2966                           | methylene groups from lipids                                |
| 3074                           | C-H ring                                                    |
| 3290                           | N-H str of proteins and O-H str of polysaccharide and water |

\* sym: symmetric, asym: asymmetric, str: stretching, vibr: vibration

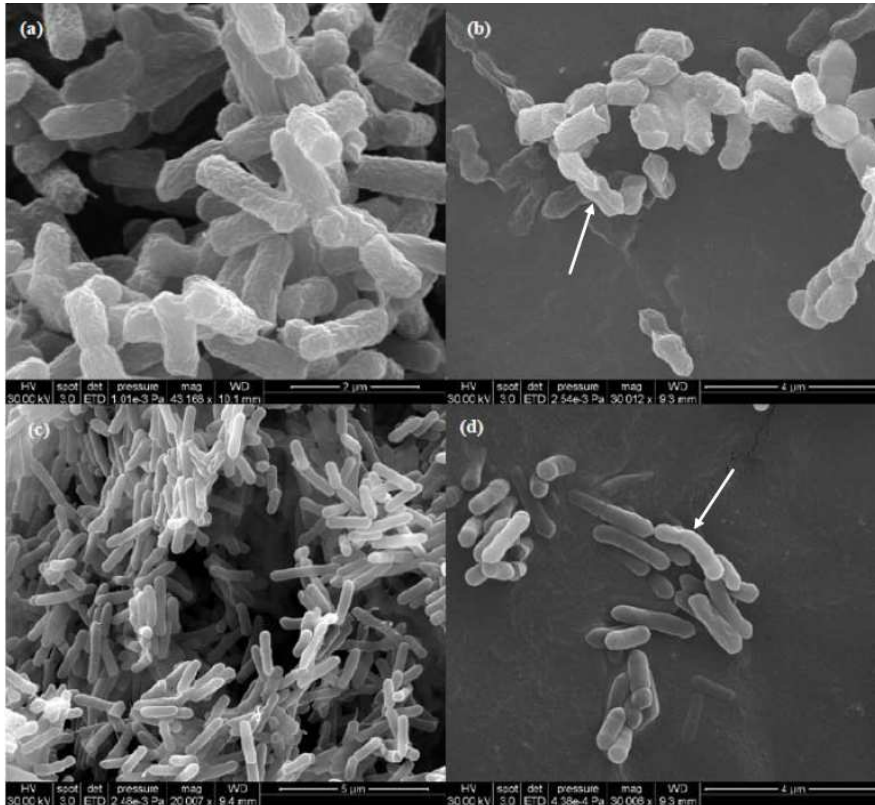

**Figure S1.** Scanning electron microscope images of *Escherichia coli* O157:H7 without (a) and with (b) the treatment of organosulfur compounds derived from garlic (*Allium sativum*) and *Listeria monocytogenes* without (c) and with (d) the treatment of organosulfur compounds derived from garlic (*Allium sativum*).

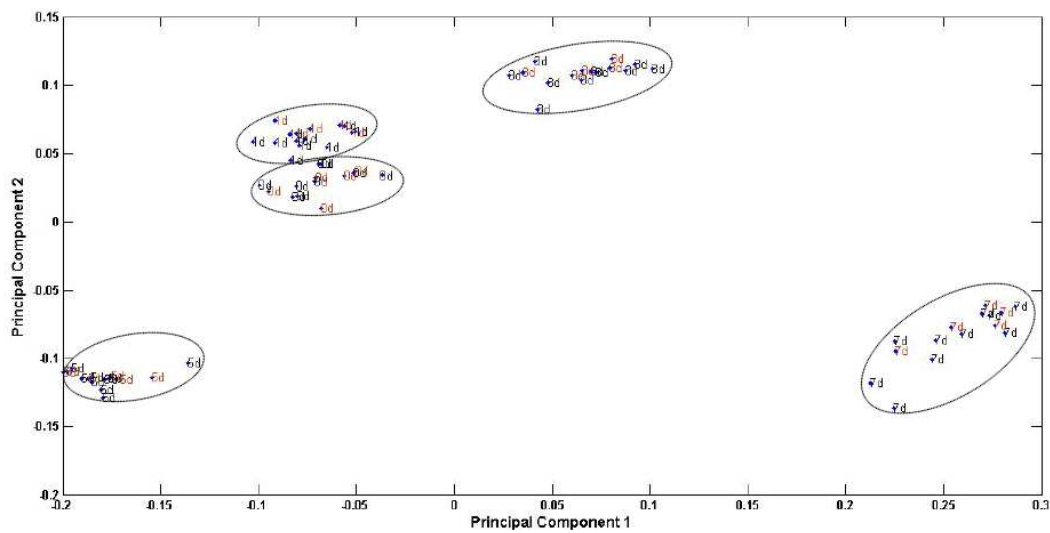

**Figure S2 (a).** Representative two-dimensional principal component analysis of *E. coli* O157:H7 cocktail in sterilized broth under 10  $\mu$ M diallyl sulfide treatment for 0 (control), 1, 3, 5, and 7 days at room temperature (22°C) using infrared spectra.

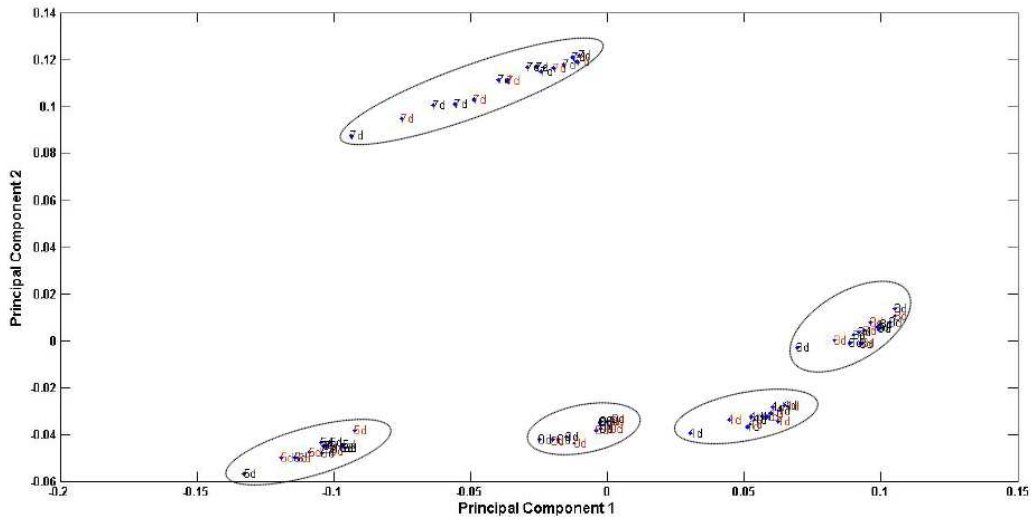

**Figure S2 (b).** Representative two-dimensional principal component analysis of *E. coli* O157:H7 cocktail in sterilized broth under 25  $\mu$ l/ml garlic concentrate treatment for 0 (control), 1, 3, 5, and 7 days at room temperature (22°C) using infrared spectra.

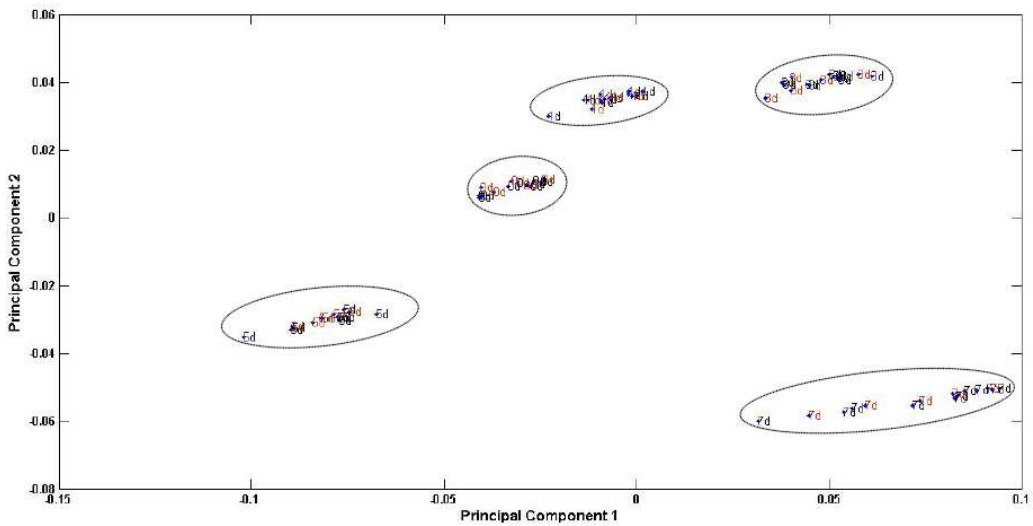

**Figure S2 (c).** Representative two-dimensional principal component analysis of *L. monocytogenes* cocktail in sterilized broth under 10  $\mu$ M diallyl sulfide treatment for 0 (control), 1, 3, 5, and 7 days at room temperature (22°C) using infrared spectra.

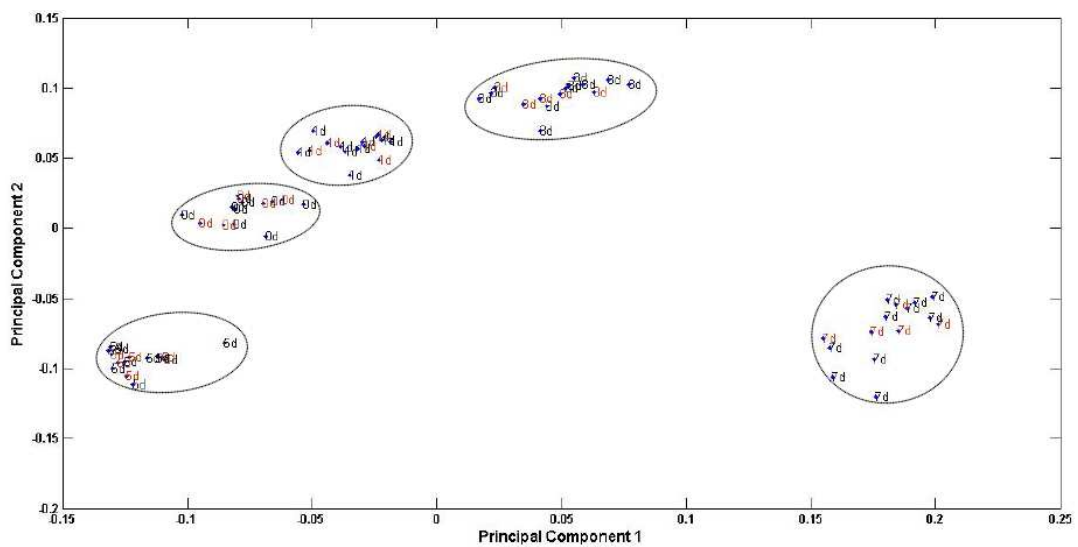

**Figure S2 (d).** Representative two-dimensional principal component analysis of *L. monocytogenes*

cocktail in sterilized broth under 25  $\mu\text{l/ml}$  garlic concentrate treatment for 0 (control), 1, 3, 5, and 7 days at room temperature (22°C) using infrared spectra.

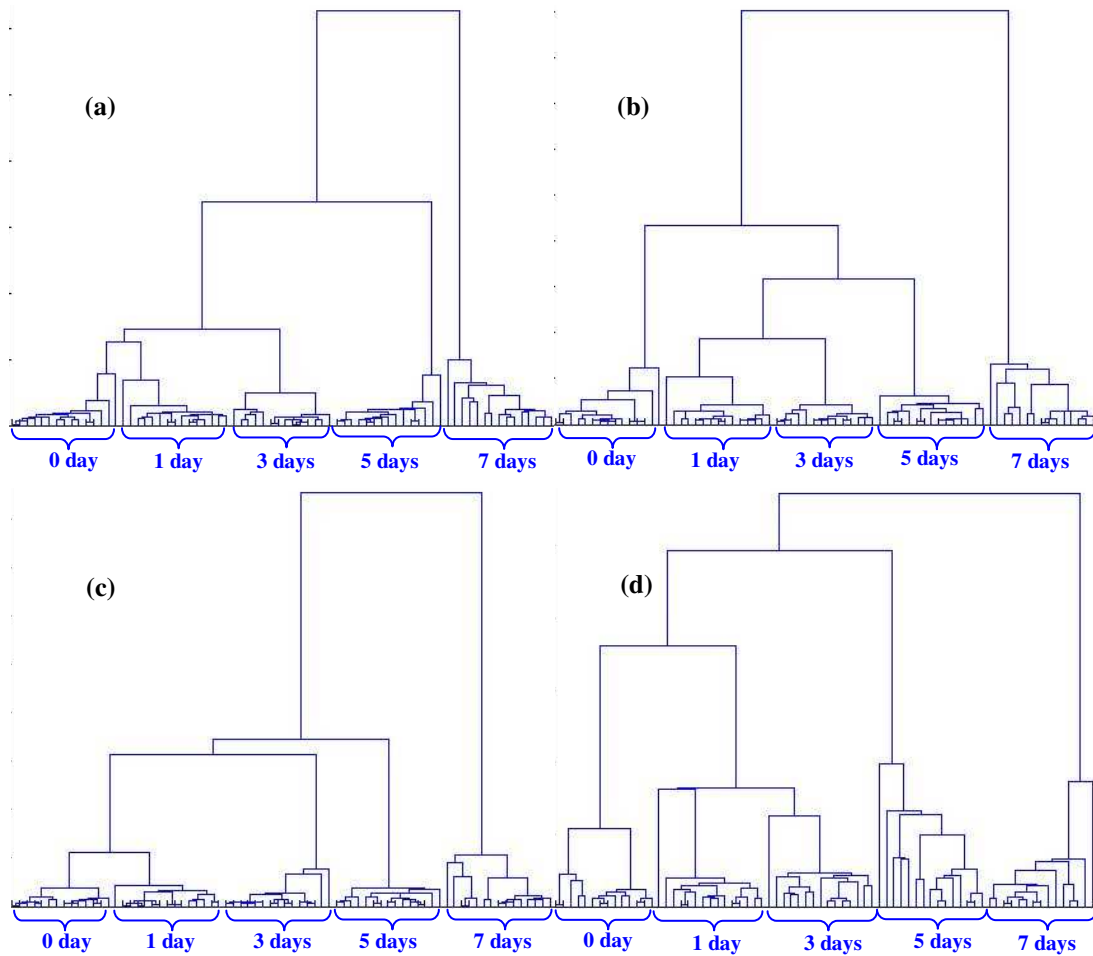

**Figure S3. Representative dendrogram analysis of *E. coli* O157:H7 cocktail in sterilized broth under (a) 10  $\mu\text{M}$  diallyl sulfide treatment (b) 25  $\mu\text{l/ml}$  garlic concentrate treatment and *L. monocytogenes* cocktail in sterilized broth under (c) 10  $\mu\text{M}$  diallyl sulfide treatment (d) 25  $\mu\text{l/ml}$  garlic concentrate treatment at room temperature (22°C) using Raman spectra.**
